# Supplementary material for: Aggregation of Aβ40/42 chains in the presence of cyclic neuropeptides investigated by molecular dynamics simulations
Source: PLoS Comput Biol. 2021 Mar 12;17(3):e1008771. doi: 10.1371/journal.pcbi.1008771 (PMC7990313; doi:10.1371/journal.pcbi.1008771)
Supplement: S4 Table — (XLSX) [file pcbi.1008771.s010.xlsx]

## Sheet: S4_Table
Chains	Aβ42-SST14
	I	II	III
A	0.145(±0.016)	0.149(±0.016)	0.144(±0.015)
B	0.143(±0.024)	0.138(±0.015)	0.138(±0.017)
C	0.132(±0.014)	0.153(±0.019)	0.139(±0.014)
D	0.155(±0.021)	0.140(±0.025)	0.119(±0.016)
E	0.174(±0.022)	0.178(±0.028)	0.097(±0.009)
F	0.160(±0.020)	0.155(±0.018)	0.198(±0.025)
G	0.133(±0.013)	0.167(±0.024)	0.189(±0.027)
H	0.159(±0.021)	0.161(±0.022)	0.141(±0.015)
Chains	Aβ42-AVP
	I	II	III
A	0.196(±0.026)	0.148(±0.020)	0.158(±0.019)
B	0.146(±0.022)	0.216(±0.031)	0.194(±0.019)
C	0.119(±0.013)	0.183(±0.032)	0.187(±0.024)
D	0.163(±0.020)	0.155(±0.023)	0.148(±0.021)
E	0.168(±0.017)	0.164(±0.020)	0.158(±0.017)
F	0.158(±0.016)	0.147(±0.019)	0.161(±0.020)
G	0.143(±0.016)	0.191(±0.024)	0.143(±0.016)
H	0.123(±0.013)	0.159(±0.023)	0.163(±0.015)
Chains	Aβ40-SST14
	I	II	III
A	0.163(±0.021)	0.119(±0.014)	0.088(±0.009)
B	0.144(±0.020)	0.135(±0.017)	0.130(±0.016)
C	0.105(±0.013)	0.199(±0.023)	0.223(±0.028)
D	0.170(±0.018)	0.093(±0.012)	0.174(±0.024)
E	0.169(±0.018)	0.197(±0.030)	0.122(±0.017)
F	0.135(±0.016)	0.203(±0.027)	0.124(±0.016)
G	0.190(±0.024)	0.106(±0.011)	0.158(±0.019)
H	0.145(±0.021)	0.126(±0.029)	0.112(±0.016)
